# Supplementary material
Source: Springer Nature journal article supplement (https://www.springermedizin.de/resource/supplementary/12873_2014_204_MOESM5_ESM.pdf/9431644)

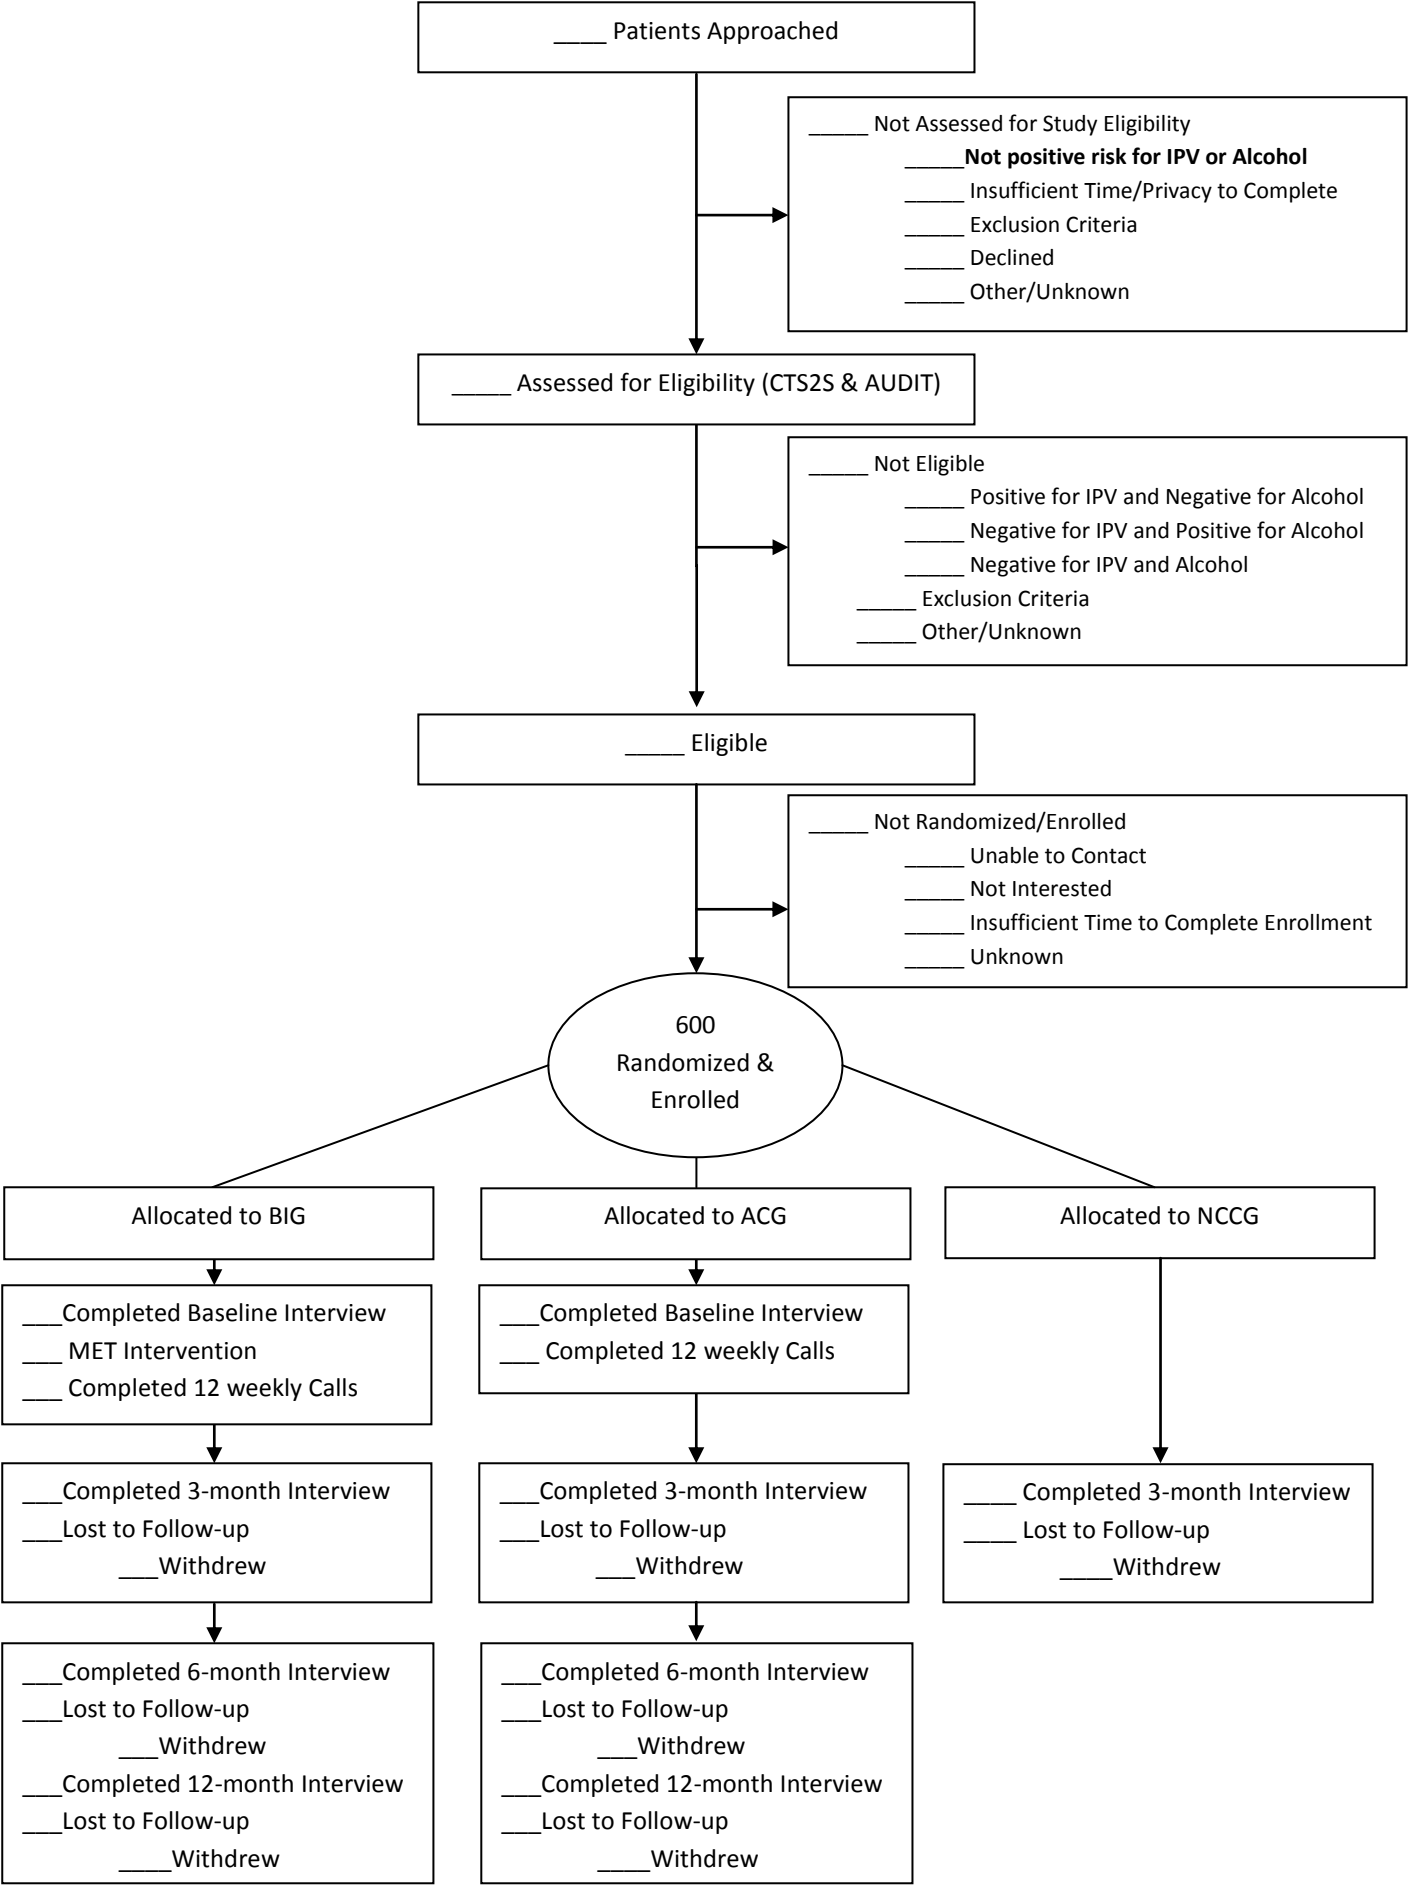

Supplement: MOESM5 [file 9431644]
